# Supplementary material
Source: ML conference proceedings conference paper supplement (https://proceedings.mlr.press/v70/zhang17g.html)
Supplement: Supplementary file [file zhang17g-supp.pdf]

---

## Projection-free Distributed Online Learning in Networks: Appendix

---

### A. Proof of Lemma 4

*Proof.* Combining Lemma 2 and Lemma 3, we can obtain the concrete recursion

$$h_{t+1,i} \leq (1 - \sigma_{t,i})h_{t,i} + \sigma_{t,i}^2 D^2 + \eta_i \left( \frac{1 + \sigma_2(P)}{1 - \sigma_2(P)} \sqrt{n} + 1 \right) L \sqrt{h_{t+1,i}}.$$

As the parameters  $\eta_i$  and  $\sigma_{t,i}$  are chosen such that  $\eta_i \left( \frac{1 + \sigma_2(P)}{1 - \sigma_2(P)} \sqrt{n} + 1 \right) L \sqrt{h_{t+1,i}} \leq \sigma_{t,i}^2 D^2$ , we can then obtain the following compact recursion

$$h_{t+1,i} \leq (1 - \sigma_{t,i})h_{t,i} + 2D^2 \sigma_{t,i}^2.$$

Now based on this recursion, we can prove the bound in the lemma by induction.

First, the base case of induction is true for  $t = 1$  since by definition we have

$$\begin{aligned} h_{1,i} &= F_{1,i}(\mathbf{x}_i(1)) - F_{1,i}(\mathbf{x}_i^*(1)) \\ &= \|\mathbf{x}_i(1) - \mathbf{x}_1(1)\|^2 - \|\mathbf{x}_i^*(1) - \mathbf{x}_1(1)\|^2 \\ &\leq 2D^2 \\ &\leq 4D^2 \sigma_{1,i}. \end{aligned}$$

Second, assuming that the bound is true for  $t$ , we now show that it also holds for  $t + 1$ :

$$\begin{aligned} h_{t+1,i} &\leq (1 - \sigma_{t,i})h_{t,i} + 2D^2 \sigma_{t,i}^2 \\ &\leq 4D^2 \sigma_{t,i} (1 - \sigma_{t,i}) + 2D^2 \sigma_{t,i}^2 \\ &= 4D^2 \sigma_{t,i} \left( 1 - \sigma_{t,i} + \frac{\sigma_{t,i}}{2} \right) \\ &= 4D^2 \sigma_{t,i} \left( 1 - \frac{\sigma_{t,i}}{2} \right) \\ &\leq 4D^2 \sigma_{t+1,i}. \end{aligned}$$

The last inequality follows from the definition of  $\sigma_{t,i}$ , which can be proved in the following section.  $\square$

### B. Proof of the last inequality in Lemma 4

For the sequence  $\sigma_{t,i} = \frac{1}{\sqrt{t}}$ ,  $t = 1, 2, \dots, T$ , the following inequality holds

$$\sigma_{t,i} \left( 1 - \frac{\sigma_{t,i}}{2} \right) \leq \sigma_{t+1,i}.$$

*Proof.* The inequality we need to prove is

$$\frac{1}{\sqrt{t}} \left( 1 - \frac{1}{2\sqrt{t}} \right) \leq \frac{1}{\sqrt{t+1}}.$$

Note that, for the right side, we have the following identity

$$\frac{1}{\sqrt{t+1}} = \frac{1}{\sqrt{t}} \frac{\sqrt{t}}{\sqrt{t+1}}.$$

Thus, dividing both sides by the common  $\frac{1}{\sqrt{t}}$ , we reach the following equivalent inequality

$$1 - \frac{1}{2\sqrt{t}} \leq \frac{\sqrt{t}}{\sqrt{t+1}}.$$

By rewriting, we have

$$1 - \frac{1}{2\sqrt{t}} \leq 1 - \frac{\sqrt{t+1} - \sqrt{t}}{\sqrt{t+1}}.$$

It then follows that

$$\frac{\sqrt{t+1} - \sqrt{t}}{\sqrt{t+1}} \leq \frac{1}{2\sqrt{t}}.$$

Multiplying  $\sqrt{t+1}\sqrt{t}$  in both sides, we obtain

$$(\sqrt{t+1} - \sqrt{t})\sqrt{t} \leq \frac{\sqrt{t+1}}{2},$$

which is equivalent to the following

$$\sqrt{t^2 + t} \leq \frac{\sqrt{t+1}}{2} + t.$$

Squaring both sides, we have

$$t^2 + t \leq t^2 + \frac{t+1}{4} + t\sqrt{t+1}.$$

Clearly, this inequality holds for any  $t = 1, \dots, T$ , since

$$t \leq \frac{t+1}{4} + t\sqrt{t+1}.$$

$\square$

### C. Proof of Lemma 6

*Proof.* We adopt the same notations used in the proof of Lemma 3. From there, we have

$$z_i(t) = \sum_{r=1}^{t-1} \sum_{j=1}^n P_{ij}^{t-r-1} \mathbf{g}_j(r).$$

To proceed, we first introduce another auxiliary sequence which are composed of the averages of the subgradients over all nodes  $i$  at each iteration

$$\bar{\mathbf{g}}(t) = \frac{1}{n} \sum_{i=1}^n \mathbf{g}_i(t).$$

Then we can show that the averaged dual variable  $\bar{\mathbf{z}}(t)$  evolves in a quite simple way

$$\begin{aligned} \bar{\mathbf{z}}(t+1) &= \frac{1}{n} \sum_{i=1}^n \left( \sum_{j=1}^n P_{ij} \mathbf{z}_j(t) + \mathbf{g}_i(t) \right) \\ &= \frac{1}{n} \sum_{j=1}^n \sum_{i=1}^n P_{ij} \mathbf{z}_j(t) + \bar{\mathbf{g}}(t) \\ &= \bar{\mathbf{z}}(t) + \bar{\mathbf{g}}(t). \end{aligned}$$

The last equation follows from the doubly stochastic property of matrix  $P$ . Based on the above recursion, we can easily deduce that

$$\bar{\mathbf{z}}(t) = \sum_{r=1}^{t-1} \bar{\mathbf{g}}(r) = \frac{1}{n} \sum_{r=1}^{t-1} \sum_{j=1}^n \mathbf{g}_j(r).$$

Hence,

$$\mathbf{z}_i(t) - \bar{\mathbf{z}}(t) = \sum_{r=1}^{t-1} \sum_{j=1}^n \left( P_{ij}^{t-r-1} - \frac{1}{n} \right) \mathbf{g}_j(r).$$

Then using the fact that  $\|\mathbf{g}_i(t)\| \leq L$ , and the properties of norm functions and matrices, we obtain

$$\begin{aligned} &\|\mathbf{z}_i(t) - \bar{\mathbf{z}}(t)\| \\ &= \left\| \sum_{r=1}^{t-1} \sum_{j=1}^n \left( P_{ij}^{t-r-1} - \frac{1}{n} \right) \mathbf{g}_j(r) \right\| \\ &\leq \sum_{r=1}^{t-1} \sum_{j=1}^n \left\| P_{ij}^{t-r-1} - \frac{1}{n} \right\| \|\mathbf{g}_j(r)\| \\ &\leq L \sum_{r=1}^{t-1} \left\| P_i^{t-r-1} - \mathbf{1}/n \right\|_1 \\ &= L \sum_{r=1}^{t-1} \left\| P^{t-r-1} \mathbf{e}_i - \mathbf{1}/n \right\|_1. \end{aligned}$$

Since the following inequality holds for any non-negative integer  $s$

$$\|P^s \mathbf{e}_i - \mathbf{1}/n\|_1 \leq \sigma_2(P)^s \sqrt{n},$$

we have

$$\begin{aligned} \|\mathbf{z}_i(t) - \bar{\mathbf{z}}(t)\| &\leq L \sum_{r=1}^{t-1} \sigma_2(P)^{t-r-1} \sqrt{n} \\ &= \frac{(1 - \sigma_2(P)^{t-1}) \sqrt{n} L}{1 - \sigma_2(P)} \\ &\leq \frac{\sqrt{n} L}{1 - \sigma_2(P)}. \end{aligned}$$

The above equation and the last inequality follow respectively from the summation formula of geometric series and the fact that  $\sigma_2(P) < 1$  when  $P$  is a doubly stochastic matrix (Berman & Plemmons, 1979).  $\square$

## D. Proof of Lemma 7

*Proof.* According to (Hosseini et al., 2013), the D-ODA algorithm with parameters  $\alpha(t)$  applied to loss functions that are  $L$ -Lipschitz with respect to a general norm attains the following regret bound

$$\begin{aligned} R_T^a(\mathbf{x}_i, \mathbf{x}) &\leq \frac{L^2}{2} \sum_{t=1}^{T-1} \alpha(t) + \frac{1}{\alpha(T)} \psi(\mathbf{x}) \\ &\quad + L \sum_{t=1}^T \alpha(t) \|\mathbf{z}_i(t) - \bar{\mathbf{z}}(t)\|_* \\ &\quad + \frac{2L}{n} \sum_{t=1}^T \alpha(t) \sum_{j=1}^n \|\mathbf{z}_j(t) - \bar{\mathbf{z}}(t)\|_*, \end{aligned}$$

where  $\|\cdot\|_*$  denotes the corresponding dual norm.

Note that the norm we utilize is the  $L_2$  norm and its dual norm is itself. Thus we can apply the bound for  $\|\mathbf{z}_i(t) - \bar{\mathbf{z}}(t)\|$  in Lemma 6 here. Combining it with the fact that  $\sum_{t=1}^{T-1} \alpha(t) \leq \sum_{t=1}^T \alpha(t)$ , the fact that  $\psi(\mathbf{x}) = \|\mathbf{x} - \mathbf{x}_1(1)\|^2 \leq D^2$  and setting  $\alpha(t) = \eta$  yields the stated regret bound in the lemma.  $\square$

## E. Verification of the validity of $\eta_i$

*Proof.* As  $\eta_i = \frac{(1 - \sigma_2(P))D}{2(\sqrt{n+1} + (\sqrt{n-1})\sigma_2(P))LT^{3/4}}$ , we have

$$\eta_i \left( \frac{1 + \sigma_2(P)}{1 - \sigma_2(P)} \sqrt{n} + 1 \right) L \sqrt{h_{t+1,i}} = \frac{D \sqrt{h_{t+1,i}}}{2T^{3/4}}.$$

By Lemma 4 and definition of  $\sigma_{t,i}$ , we have

$$h_{t+1,i} \leq 4D^2 \sigma_{t+1,i} \leq 4D^2 \sigma_{t,i}.$$

It then follows that

$$\frac{D \sqrt{h_{t+1,i}}}{2T^{3/4}} \leq \frac{\sigma_{t,i}^{1/2}}{T^{3/4}} D^2.$$

We thus only need to verify that the following inequality holds for any  $t = 1, \dots, T$

$$\frac{\sigma_{t,i}^{1/2}}{T^{3/4}} D^2 \leq \sigma_{t,i}^2 D^2.$$

This clearly holds since for any  $t = 1, \dots, T$

$$\frac{1}{T^{3/4}} \leq \sigma_{t,i}^{3/2} = \frac{1}{t^{3/4}}.$$

Thus, the choice of  $\eta_i$  satisfies the constraint required in Lemma 4.  $\square$

## References

- Berman, Abraham and Plemmons, Robert J. *Nonnegative Matrices in the Mathematical Sciences*. Academic Press, 1979.
- Hosseini, Saghar, Chapman, Airlie, and Mesbahi, Mehran. Online distributed optimization via dual averaging. In *IEEE Conference on Decision and Control*, pp. 1484–1489. IEEE, 2013.
